# Supplementary material
Source: MDPI journal article supplement (https://www.mdpi.com/2071-1050/12/20/8601)
Supplement: s1 [file s1]

## Supplementary Materials for Online Access

**Table S1: Priority areas and standard indicators used by Vital Signs.**

| Priority area             | Example indicators                                                                                                                                                                                                      |
|---------------------------|-------------------------------------------------------------------------------------------------------------------------------------------------------------------------------------------------------------------------|
| Arts and culture          | <ul style="list-style-type: none"> <li>• Library use</li> <li>• Employment in cultural occupations</li> <li>• Attendance at cultural events</li> </ul>                                                                  |
| Belonging and leadership  | <ul style="list-style-type: none"> <li>• Percent of tax filers making charitable donations</li> <li>• Volunteering rate</li> <li>• Voter turnout</li> </ul>                                                             |
| Health and wellness       | <ul style="list-style-type: none"> <li>• Low birth weight</li> <li>• Physicians per 100,000</li> <li>• Obesity rate</li> </ul>                                                                                          |
| Housing                   | <ul style="list-style-type: none"> <li>• Gross shelter income ratio</li> <li>• Ratio of average housing prices to median family income</li> <li>• Rental vacancy rate</li> </ul>                                        |
| Work                      | <ul style="list-style-type: none"> <li>• Employment rate</li> <li>• Unemployment rate</li> <li>• Employment levels and growth</li> </ul>                                                                                |
| Safety                    | <ul style="list-style-type: none"> <li>• Violent crime rate</li> <li>• Property crime rate</li> <li>• Criminal Code traffic violations</li> </ul>                                                                       |
| Gap between rich and poor | <ul style="list-style-type: none"> <li>• Overall poverty rate</li> <li>• Child poverty rate</li> <li>• Elderly poverty</li> </ul>                                                                                       |
| Learning                  | <ul style="list-style-type: none"> <li>• Proportion of population 15 and over with completed post-secondary education</li> <li>• High school non-completion rate</li> <li>• Standardized student test scores</li> </ul> |
| Getting started           | <ul style="list-style-type: none"> <li>• Net migration</li> <li>• Unemployment rate of immigrants</li> <li>• Immigrant income</li> </ul>                                                                                |
| Environment               | <ul style="list-style-type: none"> <li>• Water consumption</li> <li>• Household GHG emissions from private vehicle operation</li> <li>• Air quality</li> </ul>                                                          |

**Table S2: Most common indicators used in Vital Signs and non-Vital Signs initiatives.<sup>1</sup>**

| Vital Signs                                                                              |                         |           | Non-Vital Signs                                                                     |                              |           |
|------------------------------------------------------------------------------------------|-------------------------|-----------|-------------------------------------------------------------------------------------|------------------------------|-----------|
| Indicator                                                                                | Stock (capital)         | Frequency | Indicator                                                                           | Stock (capital)              | Frequency |
| Population of community or region                                                        | Demography (SC)         | 23        | Unemployment rate                                                                   | Labour (SC)                  | 6         |
| Population change (5-year, 10-year, or 15-year)                                          | Demography (SC)         | 21        | % of residents who have a strong or somewhat strong sense of belonging to community | Sense of belonging (SC)      | 6         |
| % senior population (65+)                                                                | Demography (SC)         | 21        | Total waste diversion rate                                                          | Waste reduction (EK)         | 5         |
| Poverty rate                                                                             | Social inclusion (SC)   | 21        | % of workforce that commutes outside of the community/region to work                | Labour (EC)                  | 5         |
| % of residents with a post-secondary education                                           | Education (SC)          | 18        | Population of community/region                                                      | Demography (SC)              | 5         |
| Child poverty rate                                                                       | Social inclusion (SC)   | 18        | Population change (5-year, 10-year, or 15-year)                                     | Demography (SC)              | 5         |
| Seniors' poverty rate                                                                    | Social inclusion (SC)   | 18        | % of residents with a post-secondary education                                      | Education (SC)               | 5         |
| % of residents who have a strong or somewhat strong sense of belonging to community      | Sense of belonging (SC) | 18        | % of residents who volunteer                                                        | Community participation (SC) | 5         |
| % of children aged 0-14                                                                  | Demography (SC)         | 16        | % of overall households spending over 30% of income on housing                      | Housing (SC)                 | 5         |
| High school graduation rate                                                              | Education (SC)          | 16        | Voter turnout in municipal elections                                                | Political participation (SC) | 5         |
| Workforce (% or #) employed in arts and culture occupations and/or sports and recreation | Arts and culture (SC)   | 15        | Poverty rate                                                                        | Social inclusion (SC)        | 5         |
| Median household income                                                                  | Economic equity (EC)    | 19        | Median household income                                                             | Economic Equity (EC)         | 4         |

<sup>1</sup> Capital abbreviations: Socio-cultural (SC), ecological (EK), economic (EC)

|                          |                         |    |  |                                                     |                         |   |
|--------------------------|-------------------------|----|--|-----------------------------------------------------|-------------------------|---|
| Major employment sectors | Economic structure (EC) | 19 |  | # of new and/or existing business licenses per year | Economic Structure (EC) | 4 |
| Unemployment rate        | Labour (EC)             | 19 |  | Employment rate                                     | Labour (EC)             | 4 |
| Employment rate          | Labour (EC)             | 16 |  | % visible minority population                       | Cultural Diversity (SC) | 4 |

**Table S3: List of Rural Canadian SI Initiatives Included in Inventory, with Initiatives Excluded During Selection**

*Initiatives Included in Inventory*

| Initiative                                                  | Location                         | Scale                     | Lead actor              | Level of rurality  |
|-------------------------------------------------------------|----------------------------------|---------------------------|-------------------------|--------------------|
| Alberni Valley Vital Signs                                  | Alberni Valley, BC               | Non-administrative region | non-profit              | Non urban-adjacent |
| Barriers and Opportunities in Northern Community Engagement | Lacloche Foothills, ON           | Non-administrative region | regional governing body | Urban-adjacent     |
| Boundary Area Vital Signs                                   | Boundary Area, BC                | Non-administrative region | non-profit              | Non urban-adjacent |
| Brandon MB Vital Signs                                      | Brandon, MB                      | Metropolitan area         | non-profit              | Small city         |
| Canmore Community Monitoring Report                         | Canmore, AB                      | Municipal                 | municipality            | Urban-adjacent     |
| Cape Breton Regional Municipality Vital Signs               | Cape Breton, NS                  | Administrative region     | non-profit              | Non urban-adjacent |
| Centre Wellington Vital Signs                               | Centre Wellington Township, ON   | Municipal                 | non-profit              | Urban-adjacent     |
| Clarenville-Bonavista Indicators                            | Clarenville-Bonavista region, NL | Administrative region     | Regional governing body | Non urban-adjacent |
| Clayoquot Sound Vital Signs                                 | Clayoquot Sound region, BC       | Non-administrative region | non-profit              | Non urban-adjacent |
| Columbia Valley Vital Signs                                 | Columbia Valley, BC              | Non-administrative region | non-profit              | Non urban-adjacent |
| Comox Valley Vital Signs                                    | Comox Valley, BC                 | Administrative region     | non-profit              | Non urban-adjacent |
| Cumberland County Vital Signs                               | Cumberland County, NS            | Administrative region     | non-profit              | Urban-adjacent     |
| Golden & Area A Vital Signs                                 | Golden, BC                       | Non-administrative region | non-profit              | Non urban-adjacent |
| Grey Bruce Vital Signs                                      | Grey-Bruce Peninsula, ON         | Multi-county              | non-profit              | Urban-adjacent     |
| Headwaters Communities in Action                            | Caledon & Dufferin County, ON    | Non-administrative region | non-profit              | Urban-adjacent     |
| Huron County Healthy Rural Policy Lens                      | Huron County, ON                 | Administrative region     | regional governing body | Urban-adjacent     |
| Little Red River Cree Nation                                | Northern Alberta                 | Indigenous territory      | Indigenous nation       | Remote/Northern    |

| Initiative                               | Location                      | Scale                     | Lead actor        | Level of rurality  |
|------------------------------------------|-------------------------------|---------------------------|-------------------|--------------------|
| Lunenburg County Vital Signs             | Lunenburg County, NS          | Administrative region     | non-profit        | Urban-adjacent     |
| Medicine Hat Vital Signs                 | Medicine Hat, AB              | Municipal                 | non-profit        | Small city         |
| My Perth Huron                           | Perth & Huron Counties, ON    | Multi-county              | Non-profit        | Urban-adjacent     |
| Napanee/Lennox & Addington Vital Signs   | Lennox & Addington County, ON | Administrative region     | non-profit        | Urban-adjacent     |
| Naskapi Nation Well-being Baseline Study | Northern Quebec               | Indigenous territory      | Indigenous nation | Remote/Northern    |
| North Okanagan Vital Signs               | North Okanagan, BC            | Administrative region     | non-profit        | Urban-adjacent     |
| Oxford County Index of Well-being        | Oxford County, ON             | Administrative region     | Academic          | Urban-adjacent     |
| Powell River Vital Signs                 | Powell River, BC              | Administrative region     | non-profit        | Non urban-adjacent |
| Prince Edward County Vital Signs         | Prince Edward County, ON      | Administrative region     | non-profit        | Urban-adjacent     |
| Prince George Vital Signs                | Prince George, BC             | metropolitan area         | non-profit        | Small city         |
| Robson Valley                            | Robson Valley, BC             | Non-administrative region | Academic          | Non urban-adjacent |
| Selkirk Vital Signs                      | Selkirk region, MB            | Non-administrative region | non-profit        | Urban-adjacent     |
| South Okanagan Vital Signs               | South Okanagan, BC            | Administrative region     | non-profit        | Urban-adjacent     |
| Squamish Vital Signs                     | Squamish, BC                  | Municipal                 | non-profit        | Urban-adjacent     |
| State of the Basin                       | Kootenay region, BC           | Non-administrative region | Academic          | Non urban-adjacent |
| Strait Region Vital Signs                | Strait region, NS             | Multi-county              | non-profit        | Non urban-adjacent |
| Sunshine Coast Vital Signs               | Sunshine Coast region, BC     | Administrative region     | non-profit        | Urban-adjacent     |
| Temiskaming Vital Signs                  | Temiskaming region, Ontario   | Non-administrative region | non-profit        | Remote/Northern    |
| West Hants Vital Signs                   | West Hants, NS                | Municipal                 | non-profit        | Urban-adjacent     |
| Whistler 2020                            | Whistler, BC                  | Municipal                 | municipality      | Urban-adjacent     |
| Winkler Vital Signs                      | Winkler, MB                   | Non-administrative region | non-profit        | Urban-adjacent     |
| Wolfville Vital Signs                    | Wolfville, NS                 | Municipal                 | non-profit        | Urban-adjacent     |

*Initiatives Excluded During Selection Process*

| <b>Initiative</b>                                                            | <b>Location</b>                      | <b>Scale</b>              | <b>Lead actor</b> | <b>Level of rurality</b>      |
|------------------------------------------------------------------------------|--------------------------------------|---------------------------|-------------------|-------------------------------|
| Banff Community Indicators                                                   | Banff, AB                            | Municipal                 | Municipality      | Urban-adjacent                |
| Campbell River Vital Signs                                                   | Campbell River, BC                   | Administrative region     | non-profit        | Non urban-adjacent            |
| Grand Bend Vital Signs                                                       | Lambton County, ON                   | Administrative region     | non-profit        | Urban-adjacent                |
| Grande Prairie Vital Signs                                                   | Grande Prairie, AB                   | Municipal                 | non-profit        | Small city                    |
| Greater Peterborough Vital Signs                                             | Peterborough, ON                     | Metropolitan ara          | non-profit        | Small city                    |
| Huronina Vital Signs                                                         | Huronina, ON                         | Non-administrative region | non-profit        | urban-adjacent                |
| Lanark County Vital Signs                                                    | Lanark County, ON                    | Administrative region     | non-profit        | Urban-adjacent                |
| Lethbridge Vital Signs                                                       | Lethbridge, AB                       | Municipal                 | non-profit        | Small city                    |
| Maple Ridge Balance Sheet                                                    | Maple Ridge, BC                      | Municipal                 | Municipality      | Urban-adjacent                |
| Muskoka Vital Signs                                                          | Muskoka, ON                          | Administrative region     | non-profit        | Urban-adjacent                |
| Peninsula Action Committee for Education (PACE) - Schools as Anchors Project | Northern Bruce Peninsula, ON         | Administrative region     | non-profit        | Non urban-adjacent            |
| Pictou County Vital Signs                                                    | Pictou County, NS                    | Administrative region     | non-profit        | Urban-adjacent                |
| Red Deer Vital Signs                                                         | Red Deer, AB                         | Municipal                 | non-profit        | Small city                    |
| Salt Spring Island Vital Signs                                               | Salt Spring Island, BC               | Non-administrative region | non-profit        | urban-adjacent                |
| Sault Saint Marie Community Quality Improvement Report                       | Sault Saint Marie, ON                | Municipal                 | Municipality      | Non urban-adjacent            |
| Shuswap BC Vital Signs                                                       | Shuswap, BC                          | Administrative region     | non-profit        | urban-adjacent                |
| Western Newfoundland Model Forest Indicators                                 | Corner Brook & Gros Morne region, NL | Non-administrative region | Government        | Small city/non urban-adjacent |

**Table S4: Community capital stocks and common indicators identified across initiatives.**

| Capital        | Stocks (total indicators)    | Commonly used indicators                                                                                                                                                                                      |
|----------------|------------------------------|---------------------------------------------------------------------------------------------------------------------------------------------------------------------------------------------------------------|
| Ecological     | Ecosystems (56)              | <ul style="list-style-type: none"> <li>• #/land area of protected areas</li> <li>• # of species at risk in the area</li> </ul>                                                                                |
|                | Climate change & energy (22) | <ul style="list-style-type: none"> <li>• Greenhouse gas emissions from major emitters/industries</li> <li>• Total GHG emissions of community/region</li> </ul>                                                |
|                | Waste reduction (22)         | <ul style="list-style-type: none"> <li>• Waste generation rate (per capita or total)</li> <li>• Waste diversion rate (per capita or total)</li> </ul>                                                         |
|                | Land use (17)                | <ul style="list-style-type: none"> <li>• # of km of hiking trails in the community/region</li> <li>• Proportion of community/region dedicated to green space</li> </ul>                                       |
|                | Water (17)                   | <ul style="list-style-type: none"> <li>• Water consumption per capita</li> <li>• # of communities that experience boil water advisories or quality advisories</li> </ul>                                      |
|                | Agriculture (14)             | <ul style="list-style-type: none"> <li>• # of active farms in the community/region</li> <li>• Land cover used for agricultural area/% change</li> </ul>                                                       |
|                | Natural resources (13)       | <ul style="list-style-type: none"> <li>• % of workforce employed in fisheries (harvesting &amp; processing)</li> <li>• Quality and abundance of large game</li> </ul>                                         |
|                | Air quality (9)              | <ul style="list-style-type: none"> <li>• Particulate matter levels</li> <li>• Air Quality Index rankings</li> </ul>                                                                                           |
| Economic       | Economic structure (72)      | <ul style="list-style-type: none"> <li>• Major employment sectors</li> <li>• #/% self-employed individuals</li> </ul>                                                                                         |
|                | Labour (63)                  | <ul style="list-style-type: none"> <li>• Unemployment rate</li> <li>• % of workforce that commutes outside of community/region to work</li> </ul>                                                             |
|                | Transportation (50)          | <ul style="list-style-type: none"> <li>• Modal split of commuters</li> <li>• Average commuting times of residents</li> </ul>                                                                                  |
|                | Economic equity (22)         | <ul style="list-style-type: none"> <li>• Median household income</li> <li>• Living wage for the community/region</li> </ul>                                                                                   |
|                | Financial resources (15)     | <ul style="list-style-type: none"> <li>• Residential/commercial property tax rates</li> <li>• Consumer bankruptcy rate</li> </ul>                                                                             |
|                |                              |                                                                                                                                                                                                               |
| Socio-cultural | Physical health (109)        | <ul style="list-style-type: none"> <li>• % of residents who are overweight and/or obese</li> <li>• % of population without a doctor</li> </ul>                                                                |
|                | Education (82)               | <ul style="list-style-type: none"> <li>• % of residents with a post-secondary education</li> <li>• High school graduation rate</li> </ul>                                                                     |
|                | Housing (66)                 | <ul style="list-style-type: none"> <li>• Average value of single family homes</li> <li>• # of affordable housing units (total or per capita)</li> </ul>                                                       |
|                | Public safety (60)           | <ul style="list-style-type: none"> <li>• Crime severity index (per capita or total)</li> <li>• # of vehicular accidents per year</li> </ul>                                                                   |
|                | Social inclusion (47)        | <ul style="list-style-type: none"> <li>• Poverty rate</li> <li>• % of population living alone</li> </ul>                                                                                                      |
|                | Sense of belonging (44)      | <ul style="list-style-type: none"> <li>• % of residents with strong or somewhat strong sense of belonging to community</li> <li>• % of residents who plan to move away/are considering moving away</li> </ul> |
|                | Food security (43)           | <ul style="list-style-type: none"> <li>• # of individuals/families served by food banks</li> <li>• % of residents who eat recommended daily amounts of fruits &amp; vegetables</li> </ul>                     |

| Capital        | Stocks (total indicators)    | Commonly used indicators                                                                                                                                                                                |
|----------------|------------------------------|---------------------------------------------------------------------------------------------------------------------------------------------------------------------------------------------------------|
| Socio-cultural | Arts & culture (37)          | <ul style="list-style-type: none"> <li>• Workforce (% or #) in arts &amp; culture or sports &amp; recreation occupations</li> <li>• Local government spending on arts and culture</li> </ul>            |
|                | Cultural diversity (35)      | <ul style="list-style-type: none"> <li>• % visible minority population</li> <li>• % Indigenous population</li> </ul>                                                                                    |
|                | Mental health (32)           | <ul style="list-style-type: none"> <li>• % of youth with self-assessed mental health of good or excellent</li> <li>• % of population with mood and anxiety disorders</li> </ul>                         |
|                | Recreation (31)              | <ul style="list-style-type: none"> <li>• Visits to recreation facilities per capita</li> <li>• Local government spending on recreation</li> </ul>                                                       |
|                | Demography (29)              | <ul style="list-style-type: none"> <li>• Population of community/region</li> <li>• Population change (5-year, 10-year, or 15-year)</li> </ul>                                                           |
|                | Political participation (28) | <ul style="list-style-type: none"> <li>• Voter turnout in elections (municipal, provincial, federal)</li> <li>• % of residents who feel they have input on decisions affecting the community</li> </ul> |
|                | Community participation (27) | <ul style="list-style-type: none"> <li>• % of residents who make charitable donations/median donations</li> <li>• # of library visits (total # or per capita)</li> </ul>                                |
|                | Gender equity (11)           | <ul style="list-style-type: none"> <li>• Proportion of women in managerial positions</li> <li>• Poverty rate by gender</li> </ul>                                                                       |
